# Supplementary material for: A novel approach for evaluating antibodies against SARS-CoV-2 using menstrual blood collected from sanitary napkins before and after vaccination and evaluation of the visual napkin score
Source: Research Square preprint supplement (doi:10.21203/rs.3.rs-737828/v2), 2021-08-04
Supplement: Supplementary file 1 [file b26024f87f7809f530da4c24.docx]

**Supplemental Table 1.**

**Antibody type, target antigen, sensitivity, and specificity of each kit according to the datasheet**

| Kit | Detectable antibody type | Target antigen | Sensitivity (%) | Specificity (%) |
| --- | --- | --- | --- | --- |
| A | IgM, IgG | ND | 97.2 | 97.9 |
| B | IgM, IgG | ND | 91.5 | 97.0 |
| C | IgM, IgG | S protein | 98.9 | 97.6 |
| D | IgG | N protein | 87.0 | 100 |

Kit A, Antron One Step Novel Coronavirus (COVID-19) IgM/IgG Test Kit; Kit B, Shionogi IgG/IgM Antibody-test Kit for COVID-19; Kit C, Lepu Medical SARS-CoV-2 Antibody Test; Kit D, Cellspect COVID-19 IgG LF/RCGLF011; S protein, spike protein; N protein, nucleoside capsid protein; ND, not disclosed.
